# Supplementary material for: The internal interaction in RBBP5 regulates assembly and activity of MLL1 methyltransferase complex
Source: PubMed Central journal article supplement (PMC6821195; doi:10.1093/nar/gkz819), 2019-09-23
Supplement: gkz819_supplemental_file.pdf [file gkz819_supplemental_file.pdf]

**The internal interaction in RBBP5 regulates assembly and activity of MLL1  
methyltransferase complex**

<sup>1</sup>Jianming Han, <sup>1</sup>Tingting Li, <sup>1</sup>Yanjing Li, <sup>2</sup>Muchun Li, <sup>1</sup>Xiaoman Wang, <sup>3,4</sup>Chao Peng,  
<sup>3,4</sup>Chen Su, <sup>3</sup>Na Li, <sup>3</sup>Yiwen Li, <sup>1</sup>Ying Xu, <sup>1,2,4</sup>Yong Chen

<sup>1</sup>State Key Laboratory of Molecular Biology, National Center for Protein Science Shanghai, CAS Center for Excellence in Molecular Cell Science, Shanghai Institute of Biochemistry and Cell Biology, Chinese Academy of Sciences; University of Chinese Academy of Sciences, 333 Haik Road, Shanghai 201210, China.

<sup>2</sup>School of Life Science and Technology, Shanghai Tech University, 100 Haik Road, Shanghai 201210, P. R. China

<sup>3</sup>National Facility for Protein Science in Shanghai, Zhangjiang Lab, Shanghai, 201210, China.

<sup>4</sup>Shanghai Science Research Center, Chinese Academy of Sciences, Shanghai, 201204, China.

Correspondence should be addressed to Y.C. (yongchen@sibcb.ac.cn)

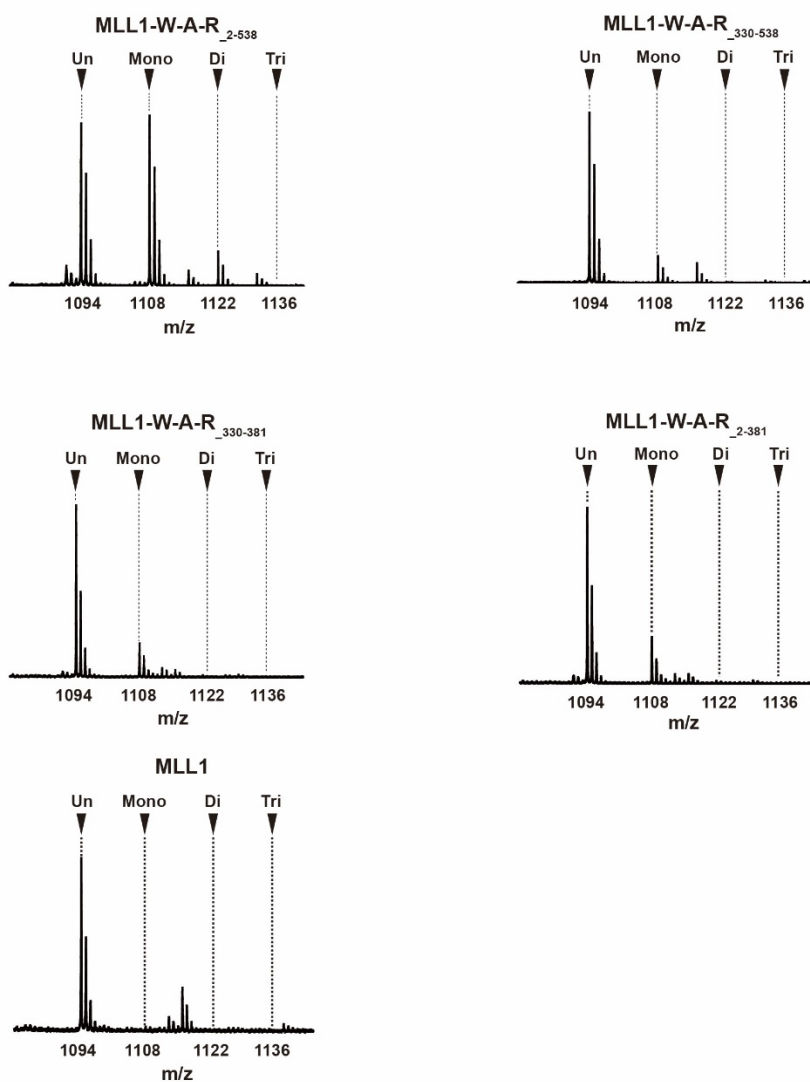

**Supplementary Figure 1. Representative MALDI-TOF spectra after 1-hour reaction for MLL1 complexes assembled with different RBBP5 fragments.** MLL1 complex with full-length RBBP5 (RBBP5<sub>2-538</sub>) is more active than others, as reflected by the higher mono-methylated H3 peak. The peaks for unmodified (Un) and mono-, di-, tri-methylated products are labeled.

| A                             |             |            | B                             |             |            |
|-------------------------------|-------------|------------|-------------------------------|-------------|------------|
| Protein1(site)-Protein2(site) | #Spec-Total | Best Score | Protein1(site)-Protein2(site) | #Spec-Total | Best Score |
| MLL1(3828)-RBBP5(338)         | 32          | 8.61E-29   | RBBP5(149)-RBBP5(172)         | 23          | 1.31E-29   |
| MLL1(3825)-RBBP5(338)         | 7           | 1.32E-29   | RBBP5(150)-RBBP5(172)         | 32          | 1.43E-23   |
| MLL1(3829)-RBBP5(288)         | 18          | 1.86E-25   | RBBP5(148)-RBBP5(172)         | 15          | 3.34E-13   |
| MLL1(3828)-RBBP5(340)         | 8           | 6.06E-23   | RBBP5(209)-RBBP5(338)         | 3           | 1.10E-27   |
| MLL1(3828)-RBBP5(349)         | 1           | 1.59E-02   | RBBP5(149)-RBBP5(174)         | 13          | 1.11E-20   |
| MLL1(3828)-RBBP5(344)         | 1           | 5.01E-02   | RBBP5(150)-RBBP5(174)         | 15          | 1.42E-20   |
| MLL1(3870)-RBBP5(338)         | 1           | 8.16E-03   | RBBP5(148)-RBBP5(174)         | 10          | 1.80E-17   |
| MLL1(3825)-RBBP5(340)         | 1           | 3.45E-10   | RBBP5(164)-RBBP5(179)         | 5           | 2.10E-17   |
| MLL1(3825)-RBBP5(341)         | 2           | 6.62E-05   | RBBP5(152)-RBBP5(172)         | 4           | 9.47E-14   |
| MLL1(3799)-RBBP5(209)         | 1           | 6.17E-02   | MLL1(3873)-MLL1(3949)         | 7           | 1.22E-11   |
| ASH2L(311)-RBBP5(338)         | 31          | 6.42E-19   | RBBP5(174)-RBBP5(236)         | 1           | 3.94E-08   |
| MLL1(3796)-RBBP5(209)         | 1           | 6.92E-08   | ASH2L(299)-ASH2L(310)         | 7           | 1.02E-07   |
| MLL1(3824)-RBBP5(338)         | 2           | 3.12E-05   | RBBP5(209)-RBBP5(340)         | 2           | 1.86E-07   |
| MLL1(3824)-RBBP5(340)         | 1           | 6.00E-04   | WDR5(27)-WDR5(313)            | 2           | 4.02E-07   |
| MLL1(3828)-RBBP5(341)         | 5           | 2.17E-21   | RBBP5(236)-RBBP5(474)         | 1           | 1.70E-05   |
| ASH2L(311)-RBBP5(344)         | 3           | 3.01E-16   | MLL1(3796)-MLL1(3933)         | 2           | 3.43E-05   |
| ASH2L(311)-RBBP5(341)         | 4           | 3.95E-15   | WDR5(1)-WDR5(292)             | 2           | 3.82E-05   |
| ASH2L(311)-RBBP5(340)         | 7           | 2.65E-12   | RBBP5(129)-RBBP5(466)         | 2           | 7.02E-05   |
| RBBP5(410)-WDR5(120)          | 16          | 4.67E-10   | MLL1(3797)-MLL1(3933)         | 2           | 1.94E-04   |
| RBBP5(412)-WDR5(120)          | 4           | 1.99E-08   | RBBP5(209)-RBBP5(344)         | 1           | 2.44E-04   |
| RBBP5(407)-WDR5(120)          | 12          | 8.03E-08   | RBBP5(129)-RBBP5(150)         | 1           | 1.69E-03   |
| RBBP5(407)-WDR5(112)          | 1           | 2.45E-05   | RBBP5(209)-RBBP5(341)         | 2           | 2.33E-03   |
| RBBP5(407)-WDR5(123)          | 13          | 2.61E-07   | MLL1(3799)-MLL1(3933)         | 1           | 7.00E-02   |
| RBBP5(407)-WDR5(159)          | 21          | 4.26E-08   | RBBP5(99)-RBBP5(449)          | 1           | 7.63E-02   |
| RBBP5(407)-WDR5(162)          | 1           | 1.25E-04   | MLL1(3795)-MLL1(3828)         | 1           | 8.86E-02   |
| RBBP5(407)-WDR5(247)          | 1           | 4.12E-03   | RBBP5(236)-RBBP5(174)         | 3           | 2.38E-06   |
| RBBP5(413)-WDR5(120)          | 4           | 1.05E-04   | RBBP5(238)-RBBP5(481)         | 1           | 5.41E-05   |
| RBBP5(450)-WDR5(58)           | 2           | 4.53E-08   | RBBP5(238)-RBBP5(482)         | 3           | 1.99E-15   |
| MLL1(3828)-RBBP5(280)         | 1           | 2.04E-05   | RBBP5(238)-RBBP5(488)         | 2           | 2.50E-02   |
| MLL1(3878)-WDR5(211)          | 5           | 4.85E-08   | RBBP5(240)-RBBP5(482)         | 2           | 2.05E-04   |
| MLL1(3828)-WDR5(211)          | 4           | 4.59E-05   | RBBP5(495)-RBBP5(238)         | 2           | 2.23E-02   |
| MLL1(3828)-WDR5(212)          | 1           | 4.00E-13   | RBBP5(513)-RBBP5(505)         | 3           | 1.19E-08   |
| RBBP5(238)-WDR5(162)          | 1           | 5.18E-02   | RBBP5(536)-RBBP5(493)         | 1           | 8.01E-02   |
| WDR5(58)-RBBP5(505)           | 5           | 3.49E-07   | RBBP5(536)-RBBP5(517)         | 1           | 3.73E-06   |
| WDR5(211)-MLL1(3825)          | 3           | 6.86E-07   | RBBP5(536)-RBBP5(482)         | 5           | 9.66E-10   |
| WDR5(211)-RBBP5(505)          | 2           | 1.09E-03   | RBBP5(536)-RBBP5(505)         | 5           | 1.25E-06   |
| MLL1(3878)-WDR5(212)          | 1           | 7.09E-15   | RBBP5(536)-RBBP5(488)         | 2           | 1.75E-05   |
|                               |             |            | RBBP5(338)-RBBP5(209)         | 1           | 2.49E-06   |

**Supplementary Figure 2. Crosslinking mass spectrometry (CX-MS) analysis of the MLL1<sub>3754-3969</sub>-WDR5<sub>23-334</sub>-ASH2L<sub>FL</sub>-RBBP5<sub>FL</sub> (M1WAR) complex.** The purified M1WAR complex was crosslinked by EDC (1-ethyl-3-[3-imethylaminopropyl] carbodiimide hydrochloride) coupled with Sulfo-NHS and analyzed by MS. This analysis identified 37 pairs of inter-molecular interaction (A) and 38 pairs of intra-molecular interaction (B) with a pLink2 score less than 0.01.

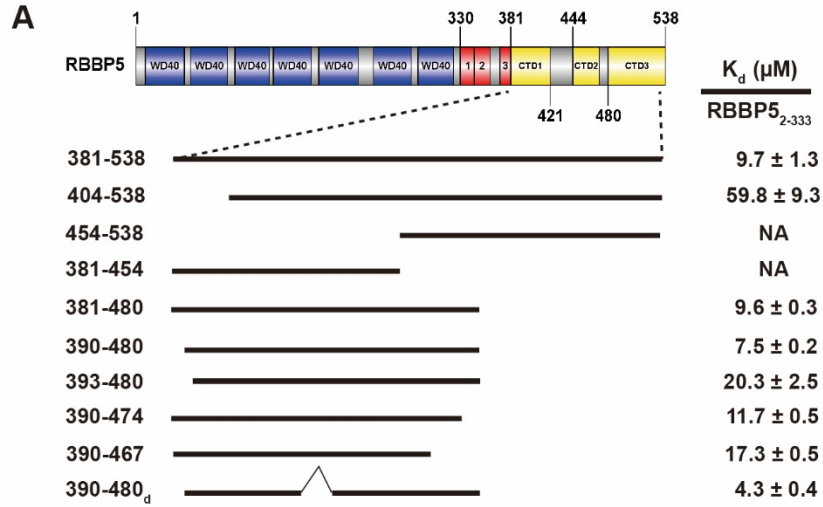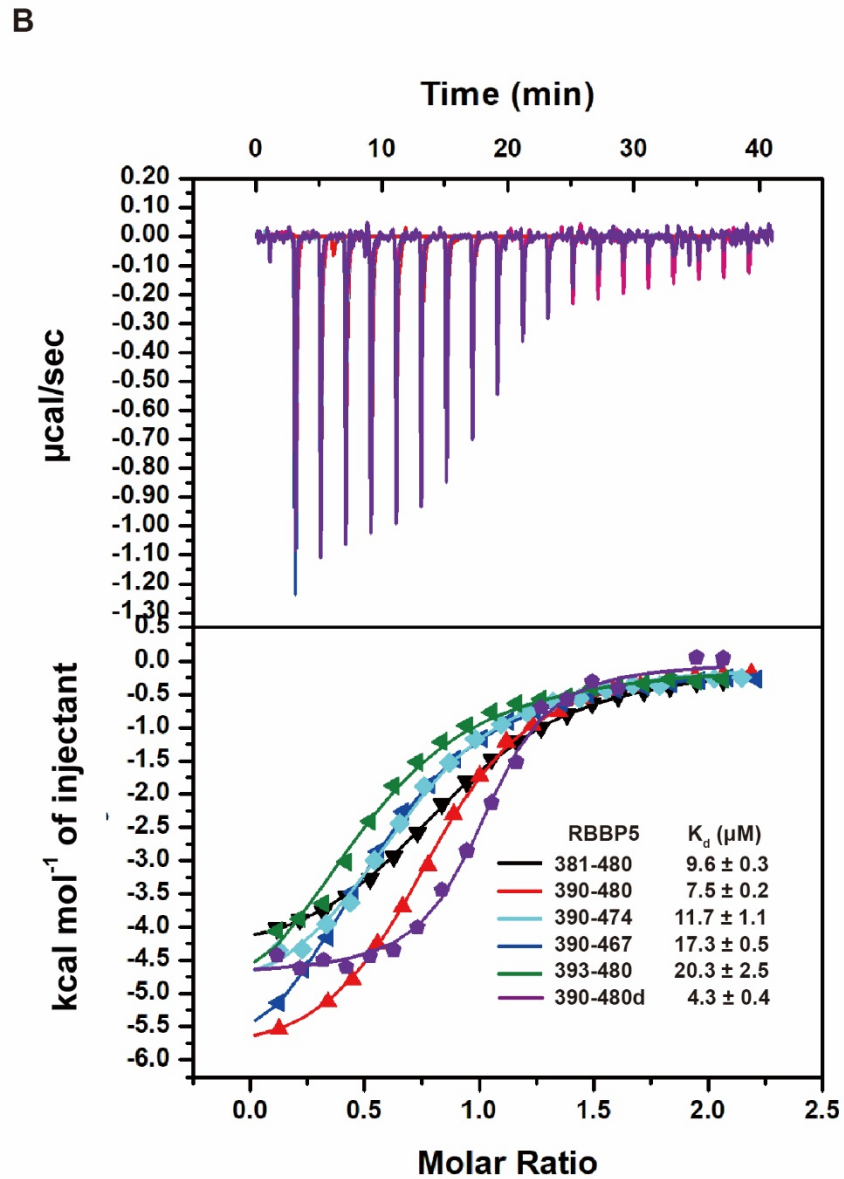

**Supplementary Figure 3. Mapping interaction fragments between CTD and WD40 of RBBP5.**

**A.** Schematic summary of different RBBP5 C-terminal constructs tested for binding to RBBP5<sub>2-333</sub> by isothermal titration calorimetry (ITC) assays. NA stands for no heat change during injections. 390-480d represents RBBP5<sub>390-480</sub> with a loop deletion from 422 to 443.

**B.** Representative ITC data for the binding of different RBBP5 C-terminal constructs to RBBP5<sub>2-333</sub>. The upper panel is the heat change upon titration of RBBP5 C-terminal construct into RBBP5<sub>2-333</sub>, and the lower panel is the binding isotherm profile. The assay buffer is 300 mM NaCl, 25 mM Tris-HCl, pH 8.0. The dissociation constants ( $K_d$ ) and the reported fitting errors were determined from the representative ITC curves by data fitting using one-site binding model.

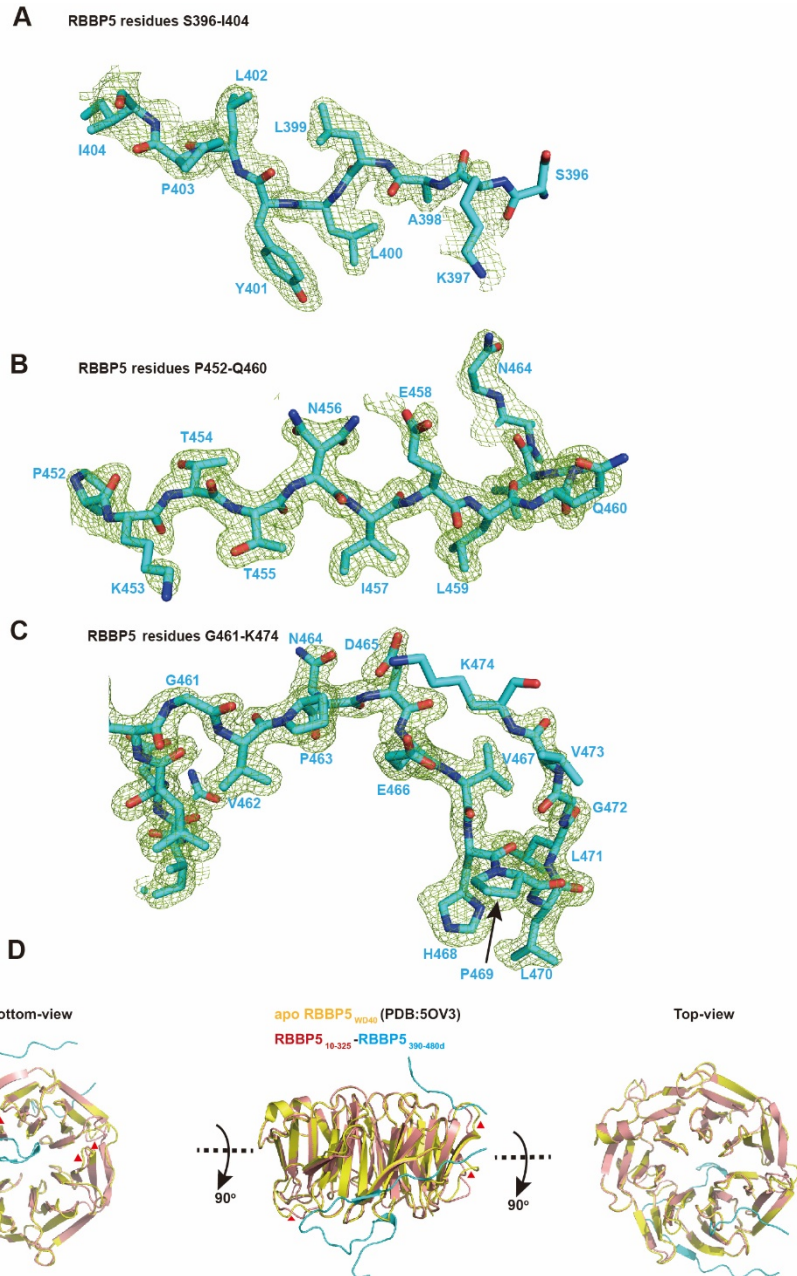

**Supplementary Figure 4. The crystal structure of RBBP5<sub>WD40</sub>-RBBP5<sub>CTD</sub>.**

**A.** The Fo-Fc omit map contoured at the  $3\delta$  level is shown for RBBP5<sub>CTD1</sub> (residues S396-I404).

**B.** The Fo-Fc omit map contoured at the  $3\delta$  level is shown for the N-terminal part of RBBP5<sub>CTD2</sub> (residues P452-Q460).

**C.** The Fo-Fc omit map contoured at the  $3\sigma$  level is shown for the C-terminal part of RBBP5<sub>CTD2</sub> (residues G461-K474).

**D.** Superimposition of apo WD40 propeller of RBBP5 (PDB: 5OV3) and RBBP5<sub>10-325</sub>-RBBP5<sub>390-480d</sub> complex shows that there is no significant conformational change on WD40 propeller except for some loops contacting RBBP5<sub>CTD</sub> (labeled with red triangles).

A

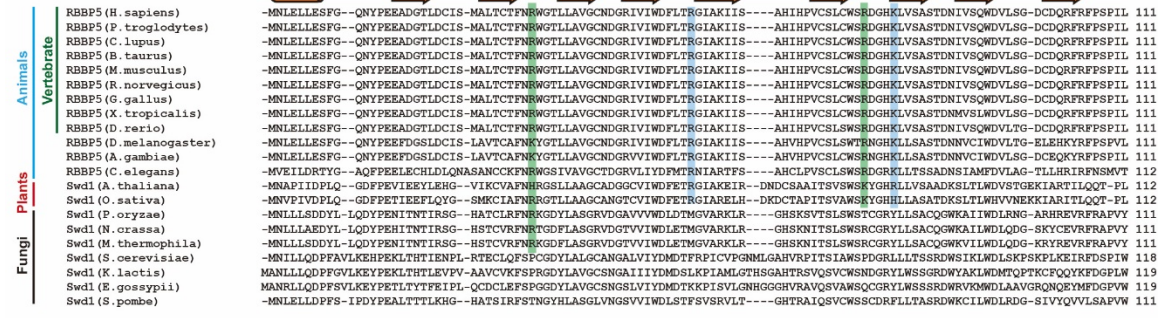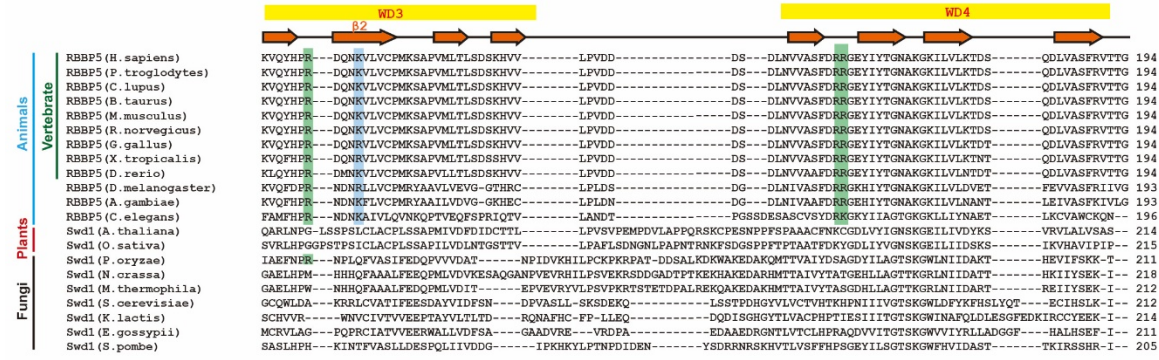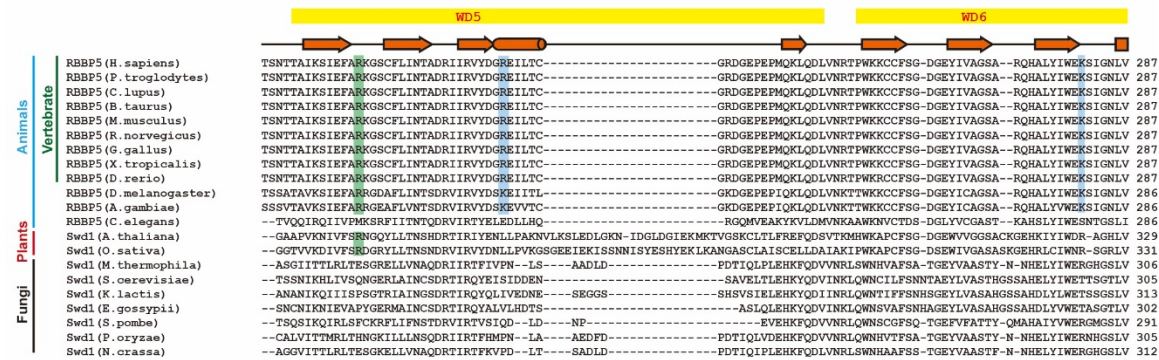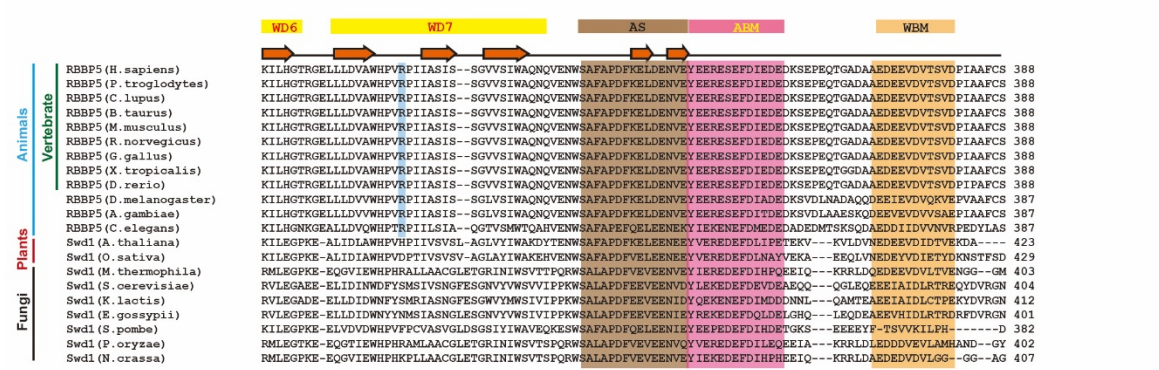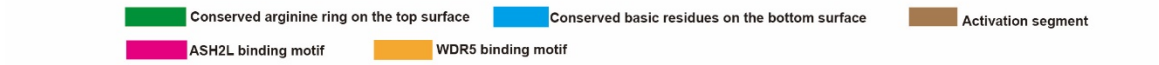



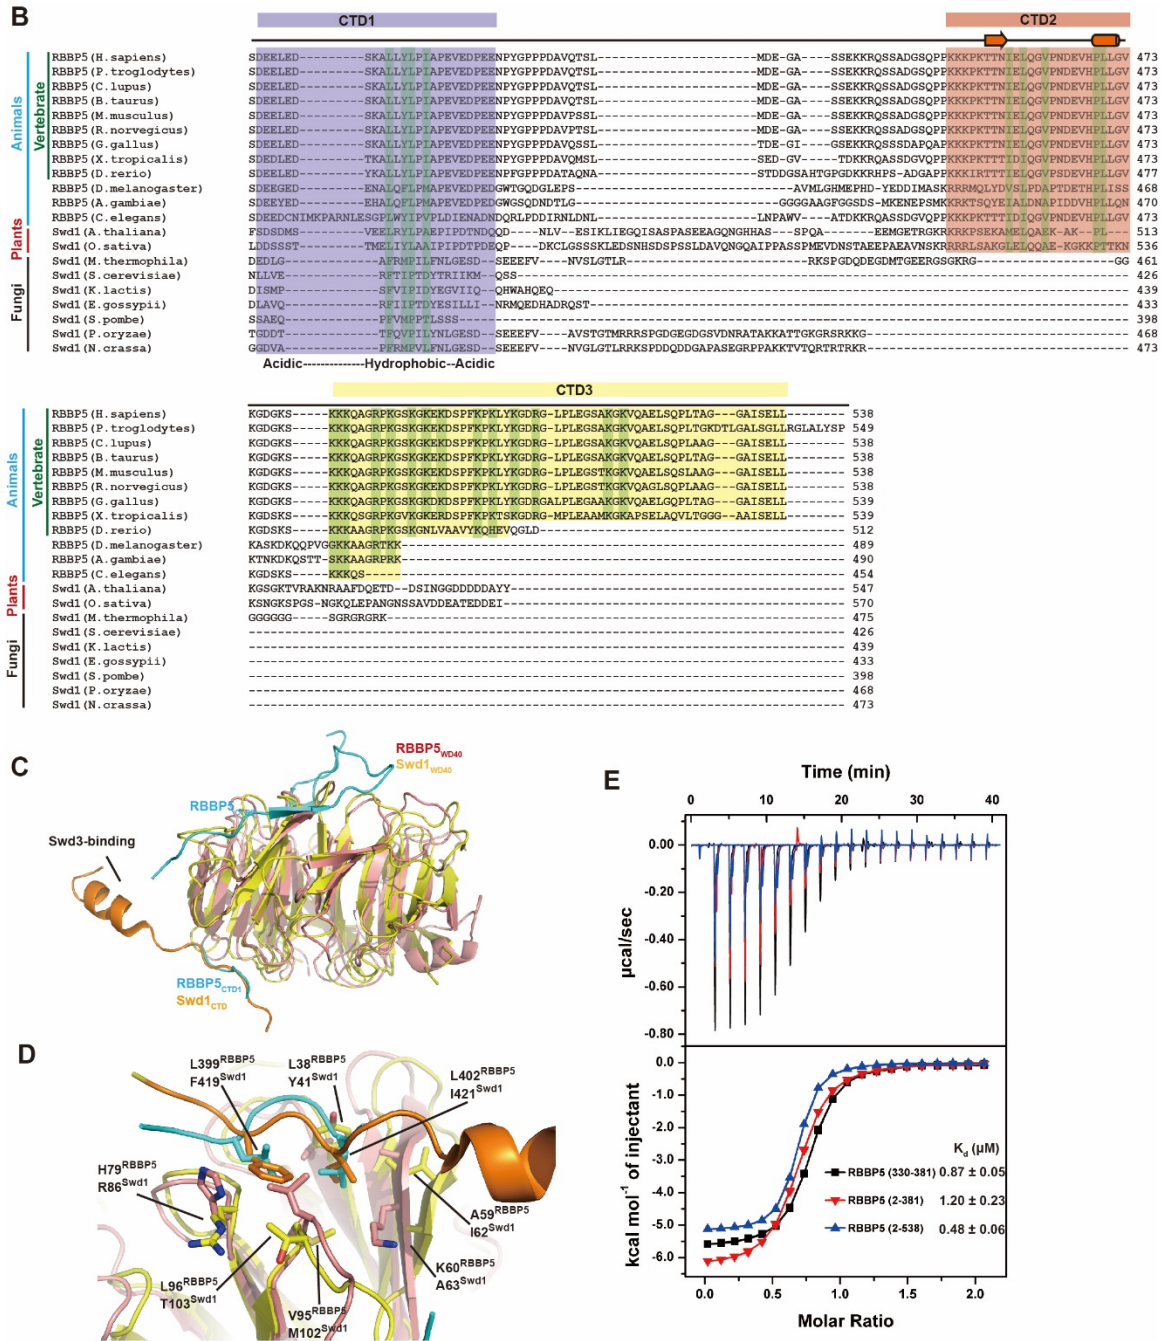

Supplementary Figure 5. Comparison of RBBP5 from different species.

A. Sequence alignment of RBBP5 orthologs from yeast, plant, and animal species. RBBP5 WD40 propeller and WDRP region are shown. Secondary structure assignments based on the hRBBP5 and ySwd1 structures are shown as cylinders ( $\alpha$ -helices) and arrows ( $\beta$  strands)

above the sequences. Conserved arginine residues (arginine-ring) at the top surface of WD40 propeller are highlighted in green. The lysine/arginine residues at the bottom of WD40 propeller are highlighted in cyan. These basic residues are conserved in animal species but not in yeast and plant species.

**B.** Sequence alignment of CTD regions of RBBP5 orthologs from yeast, plant and animal species. The conserved hydrophobic residues in CTD1 and CTD2 are highlighted. The conserved basic residues in CTD3 are also highlighted.

**C.** Structure superimposition of Swd1 (PDB: 6CHG) and hRBBP5 based on the WD40 propeller. The CTD from Swd1 has an extra helix extension involved in Swd3 binding. RBBP5<sub>WD40</sub>, red; RBBP5<sub>CTD1</sub>, cyan; Swd1<sub>WD40</sub>, yellow; Swd1<sub>CTD1</sub>, orange.

**D.** The relatively conserved interface between RBBP5<sub>WD40</sub> and RBBP5<sub>CTD1</sub>. The structural equivalent residues in RBBP5 and Swd1 are indicated.

**E.** ITC analysis of the RBBP5-WDR5 interaction in the buffer of 150 mM NaCl, 25 mM Tris-HCl, pH8.0. The dissociation constants ( $K_d$ ) and the reported fitting errors were determined from the representative ITC curves by data fitting using one-site binding model.

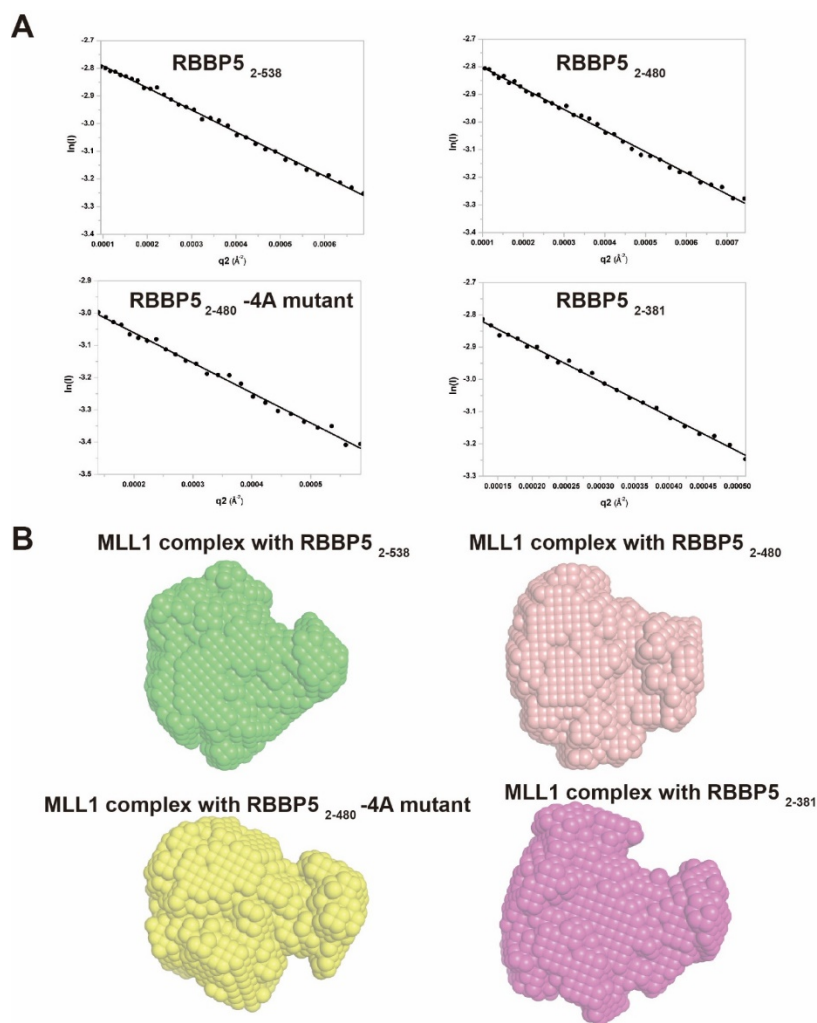

**Supplementary Figure 6. Small-angle X-ray scattering analyses of MLL1-WDR5-RBBP5-ASH2L complex.**

**A.** The Guinier plots of the scattering data show a linear fit at low  $q$ . SAXS data shown were from 2 mg/mL MLL1-WDR5-ASH2L-RBBP5 complexes. MLL1 contains residues 3754-3969, WDR5 contains residues 23-334, and ASH2L is full-length. RBBP5 used are indicated in each panel.

**B.** The *ab initio* solution structures of MLL1-WDR5-ASH2L-RBBP5 complexes with different RBBP5 constructs.

**Supplementary Table 1. Summary of SAXS analyses of MLL1<sub>3754-3769</sub>-WDR5<sub>23-334</sub>-ASH2L<sub>FL</sub>-RBBP5 complexes assembled with different RBBP5 fragments.**

(a) Sample details

|                                                                                                    | 2-381                                                  | 2-480              | 2-480-4A*          | 2-538              |
|----------------------------------------------------------------------------------------------------|--------------------------------------------------------|--------------------|--------------------|--------------------|
| Organism                                                                                           | <i>Homo sapiens</i>                                    |                    |                    |                    |
| Source (Catalogue No. or reference)                                                                | <i>E.coli</i> expressed                                |                    |                    |                    |
|                                                                                                    | Q15291(2-381)                                          | Q15291(2-480)      | Q15291(2-480-4A*)  | Q15291(2-538)      |
| UniProt sequence ID (residues in construct)                                                        | Q03164 (3754-3969)                                     | Q03164 (3754-3969) | Q03164 (3754-3969) | Q03164 (3754-3969) |
|                                                                                                    | P61964 (23-334)                                        | P61964 (23-334)    | P61964 (23-334)    | P61964 (23-334)    |
|                                                                                                    | Q9UBL3-3 (1-534)                                       | Q9UBL3-3 (1-534)   | Q9UBL3-3 (1-534)   | Q9UBL3-3 (1-534)   |
| Extinction coefficient $\epsilon$ (wavelength and units) (A280, M <sup>-1</sup> cm <sup>-1</sup> ) | 234130                                                 | 236690             | 236690             | 237970             |
| Molecular mass $M$ from chemical composition (KDa)                                                 | 161.8                                                  | 172.3              | 172.1              | 178.4              |
| Concentration (mg/ml)                                                                              | 0.5-2                                                  | 0.5-2              | 0.5-2              | 0.5-2              |
| Solvent composition and source                                                                     | 300 mM NaCl, 25 mM Tris pH 8.0, 4% glycerol, 1 mM TCEP |                    |                    |                    |

(b) SAS data collection parameters

|                                                                   |                                                                                                                                              |
|-------------------------------------------------------------------|----------------------------------------------------------------------------------------------------------------------------------------------|
| Source, instrument and description or reference                   | BL19U2 at SSRF with Pilatus 1M (DECTRIS Ltd)                                                                                                 |
| Wavelength (Å)                                                    | 0.9184                                                                                                                                       |
| Beam geometry (size, sample-to-detector distance)                 | 340µm x 60µm (H x V), 2.415m                                                                                                                 |
| $q$ -measurement range (Å <sup>-1</sup> or nm <sup>-1</sup> )     | 0.008-0.47                                                                                                                                   |
| Absolute scaling method                                           | Comparison with scattering with 1 mm pure H <sub>2</sub> O                                                                                   |
| Basis for normalization to constant counts                        | Take silver behenate as standard to set the mask, then normalize the 2D images                                                               |
| Method for monitoring radiation damage, X-ray dose where relevant | SAXS data were collected as continuous serial exposures and scattering profiles for the passes were compared to monitor the radiation damage |
| Exposure time, number of exposures                                | 1 s per frame, total 20 frames                                                                                                               |
| Sample temperature (°C)                                           | 10                                                                                                                                           |

(c) Software employed for SAS data reduction, analysis and interpretation

|                                         |                                                                                                                                                             |
|-----------------------------------------|-------------------------------------------------------------------------------------------------------------------------------------------------------------|
| SAS data reduction                      | $\ln(I)$ versus $q^2$ using OriginPro 8 ( <a href="http://www.OriginLab.com">http://www.OriginLab.com</a> ), solvent subtraction using PRIMUS (ATSAS 2.8.0) |
| Extinction coefficient estimate         | <a href="http://protcalc.sourceforge.net/">http://protcalc.sourceforge.net/</a>                                                                             |
| Basic analyses: Guinier, $P(r)$ , $V_p$ | PRIMUS (ATSAS 2.8.0)                                                                                                                                        |
| Shape/bead modelling                    | DAMMIF and DAMAVER                                                                                                                                          |

| (d) Structural parameters                                         |                                                |                                                |                                                |                                                |
|-------------------------------------------------------------------|------------------------------------------------|------------------------------------------------|------------------------------------------------|------------------------------------------------|
|                                                                   | 2-381                                          | 2-480                                          | 2-480-4A*                                      | 2-538                                          |
| Guinier Analysis                                                  |                                                |                                                |                                                |                                                |
| $I(0)$ (cm <sup>-1</sup> )                                        | 0.069±0.00032                                  | 0.067±0.00023                                  | 0.058±0.00021                                  | 0.068±0.00018                                  |
| $R_g$ (Å)                                                         | 56.69±1.07                                     | 49.83±0.62                                     | 53.46±0.82                                     | 49.93±0.52                                     |
| $q$ -range (Å <sup>-1</sup> )                                     | 0.0092-0.0226                                  | 0.0097-0.0257                                  | 0.0097-0.0241                                  | 0.0097-0.0257                                  |
| Quality-of-fit parameter (fidelity)                               | 0.91                                           | 0.79                                           | 0.95                                           | 0.92                                           |
| $M$ (KDa) from $I(0)$ (ratio to expected value)                   | 171.6 (1.06)                                   | 160.8 (0.93)                                   | 164.4 (0.96)                                   | 193.5 (1.08)                                   |
| $P(r)$ analysis                                                   |                                                |                                                |                                                |                                                |
| $I(0)$ (cm <sup>-1</sup> )                                        | 0.0682                                         | 0.066                                          | 0.0574                                         | 0.0673                                         |
| $R_g$ (Å)                                                         | 57.07                                          | 49.65                                          | 53.88                                          | 50.16                                          |
| $d_{max}$ (Å)                                                     | 185.5                                          | 152.5                                          | 172                                            | 155                                            |
| $q$ -range (Å <sup>-1</sup> )                                     | 0.0092-0.1223                                  | 0.0097-0.0.1290                                | 0.0097-0.1316                                  | 0.0097-0.1475                                  |
| Quality-of-fit parameter (Total estimate from <i>GNOM</i> )       | 0.91                                           | 0.94                                           | 0.93                                           | 0.95                                           |
| $M$ (KDa) from $I(0)$ (ratio to expected value)                   | 169.6 (1.05)                                   | 158.4 (0.92)                                   | 162.7 (0.95)                                   | 191.5 (1.07)                                   |
| Porod volume estimate (Å <sup>3</sup> )                           | 360000                                         | 256000                                         | 313000                                         | 282000                                         |
| (e) Shape modelling results (a complete panel for each method)    |                                                |                                                |                                                |                                                |
| $q$ -range for fitting(Å <sup>-1</sup> )                          | 0.0092-0.3000                                  | 0.0097-0.3000                                  | 0.0097-0.3000                                  | 0.0097-0.3000                                  |
| Symmetry/anisotropy assumptions                                   | $P1$                                           | $P1$                                           | $P1$                                           | $P1$                                           |
| Ambiguity measure(s)                                              | Filteriing of averaged <i>ab initio</i> models | Filteriing of averaged <i>ab initio</i> models | Filteriing of averaged <i>ab initio</i> models | Filteriing of averaged <i>ab initio</i> models |
| $\chi^2$ value                                                    | 1.187                                          | 1.36                                           | 1.339                                          | 1.582                                          |
| NSD value betten clusters                                         | 1.753                                          | 1.683                                          | 1.778                                          | 1.585                                          |
| Model volume (nm <sup>3</sup> )                                   | 151.5                                          | 167.1                                          | 115                                            | 159.6                                          |
| Model precision/resolution (nm)                                   | 2.799                                          | 2.707                                          | 2.833                                          | 2.653                                          |
| (f) Data and model deposition IDs                                 |                                                |                                                |                                                |                                                |
| SASDBD                                                            | SASDGD4                                        | SASDGE4                                        | SASDGF4                                        | SASDGG4                                        |
| ( <a href="https://www.sasbdb.org/">https://www.sasbdb.org/</a> ) |                                                |                                                |                                                |                                                |

\* 4A stands for L399A/L400A/I457A/L459A mutation of RBBP5.
